# Supplementary material for: Viral Sequences Detection by High-Throughput Sequencing in Cerebrospinal Fluid of Individuals with and without Central Nervous System Disease
Source: PubMed Central journal article supplement (PMC6723360; doi:10.3390/genes10080625), 2019-08-19

| r(RT-)PCR assays | Viruses Detected         | Sequence (5' to 3')                         |                                                    |                               | Final [uM]<br>Fwd/Rev/<br>Probe | r(RT-)<br>PCR<br>annealing<br>tempera<br>ture °C | Reference                                                                          |
|------------------|--------------------------|---------------------------------------------|----------------------------------------------------|-------------------------------|---------------------------------|--------------------------------------------------|------------------------------------------------------------------------------------|
|                  |                          | Fwd primer                                  | Probe                                              | Rev Primer                    |                                 |                                                  |                                                                                    |
|                  | Torque Teno virus        | GTTTTTCYACGCCCGTCC                          | FAM - ACTCACCTHCGGCACCCGC -<br>BHQ1                | CCTTGACTYCGGTGTGTA<br>A       | 0.9/0.9/0.2                     | 60                                               | Masouridi-Levrat S, et al. Bone Marrow Transplant. 2016;51:440-442.                |
|                  | Adenovirus               | GCCCCAGTGGTCTTACA<br>TGCACATC               | FAM -<br>TGCACCAGACCCGGGCTCAGGTA<br>CTCCG A -TAMRA | gvGCCACGGTGGGGTTTC<br>TAAACTT | 0.9/0.9/0.2                     | 60                                               | <b>adapted from</b> Verheyen J, et al. Appl Environ Microbiol 2009; 75: 2798-2801. |
|                  | Merkel cell polyomavirus | CCCTTTGGAGCAAATTC<br>CA                     | FAM -<br>CAAAATATCCACAAGCTCAGAAGTGA -<br>TAMRA     | CTGACCTCATCAAACATA<br>GAGAA   | 0.6/0.6/0.2<br>5                | 55                                               | Arvia R. et al. Journal of Virological Methods 246 (2017) 15-20                    |
|                  | Human pegivirus-1        | GGCGACCGGCCAAAA                             | FAM -<br>TGACCGGGATTTACGACCTACCAACCCT<br>- TAMRA   | CTTAAGACCCACCTATAG<br>TGGTACC | 0.9/0.9/0.2                     | 55                                               | Chivero ET et al. The Journal of general virology. 2014;95:1307-19.                |
|                  | Epstein-Barr virus       | CGGAAGCCCTCTGGACT<br>TC                     | FAM -<br>TGTACACGCACGAGAAATGCGCCT -<br>TAMRA       | CCCTGTTTATCCGATGGA<br>ATG     | 0.2/0.2/0.1                     | 60                                               | Kimura H et al. J Clin Microbiol 1999: 37:132-6                                    |
|                  | Human herpes virus 7     | Genesig™ Detection Kit, Human Herpesvirus 7 |                                                    |                               | unknown                         | 60                                               | PrimerDesign, England, United Kingdom                                              |

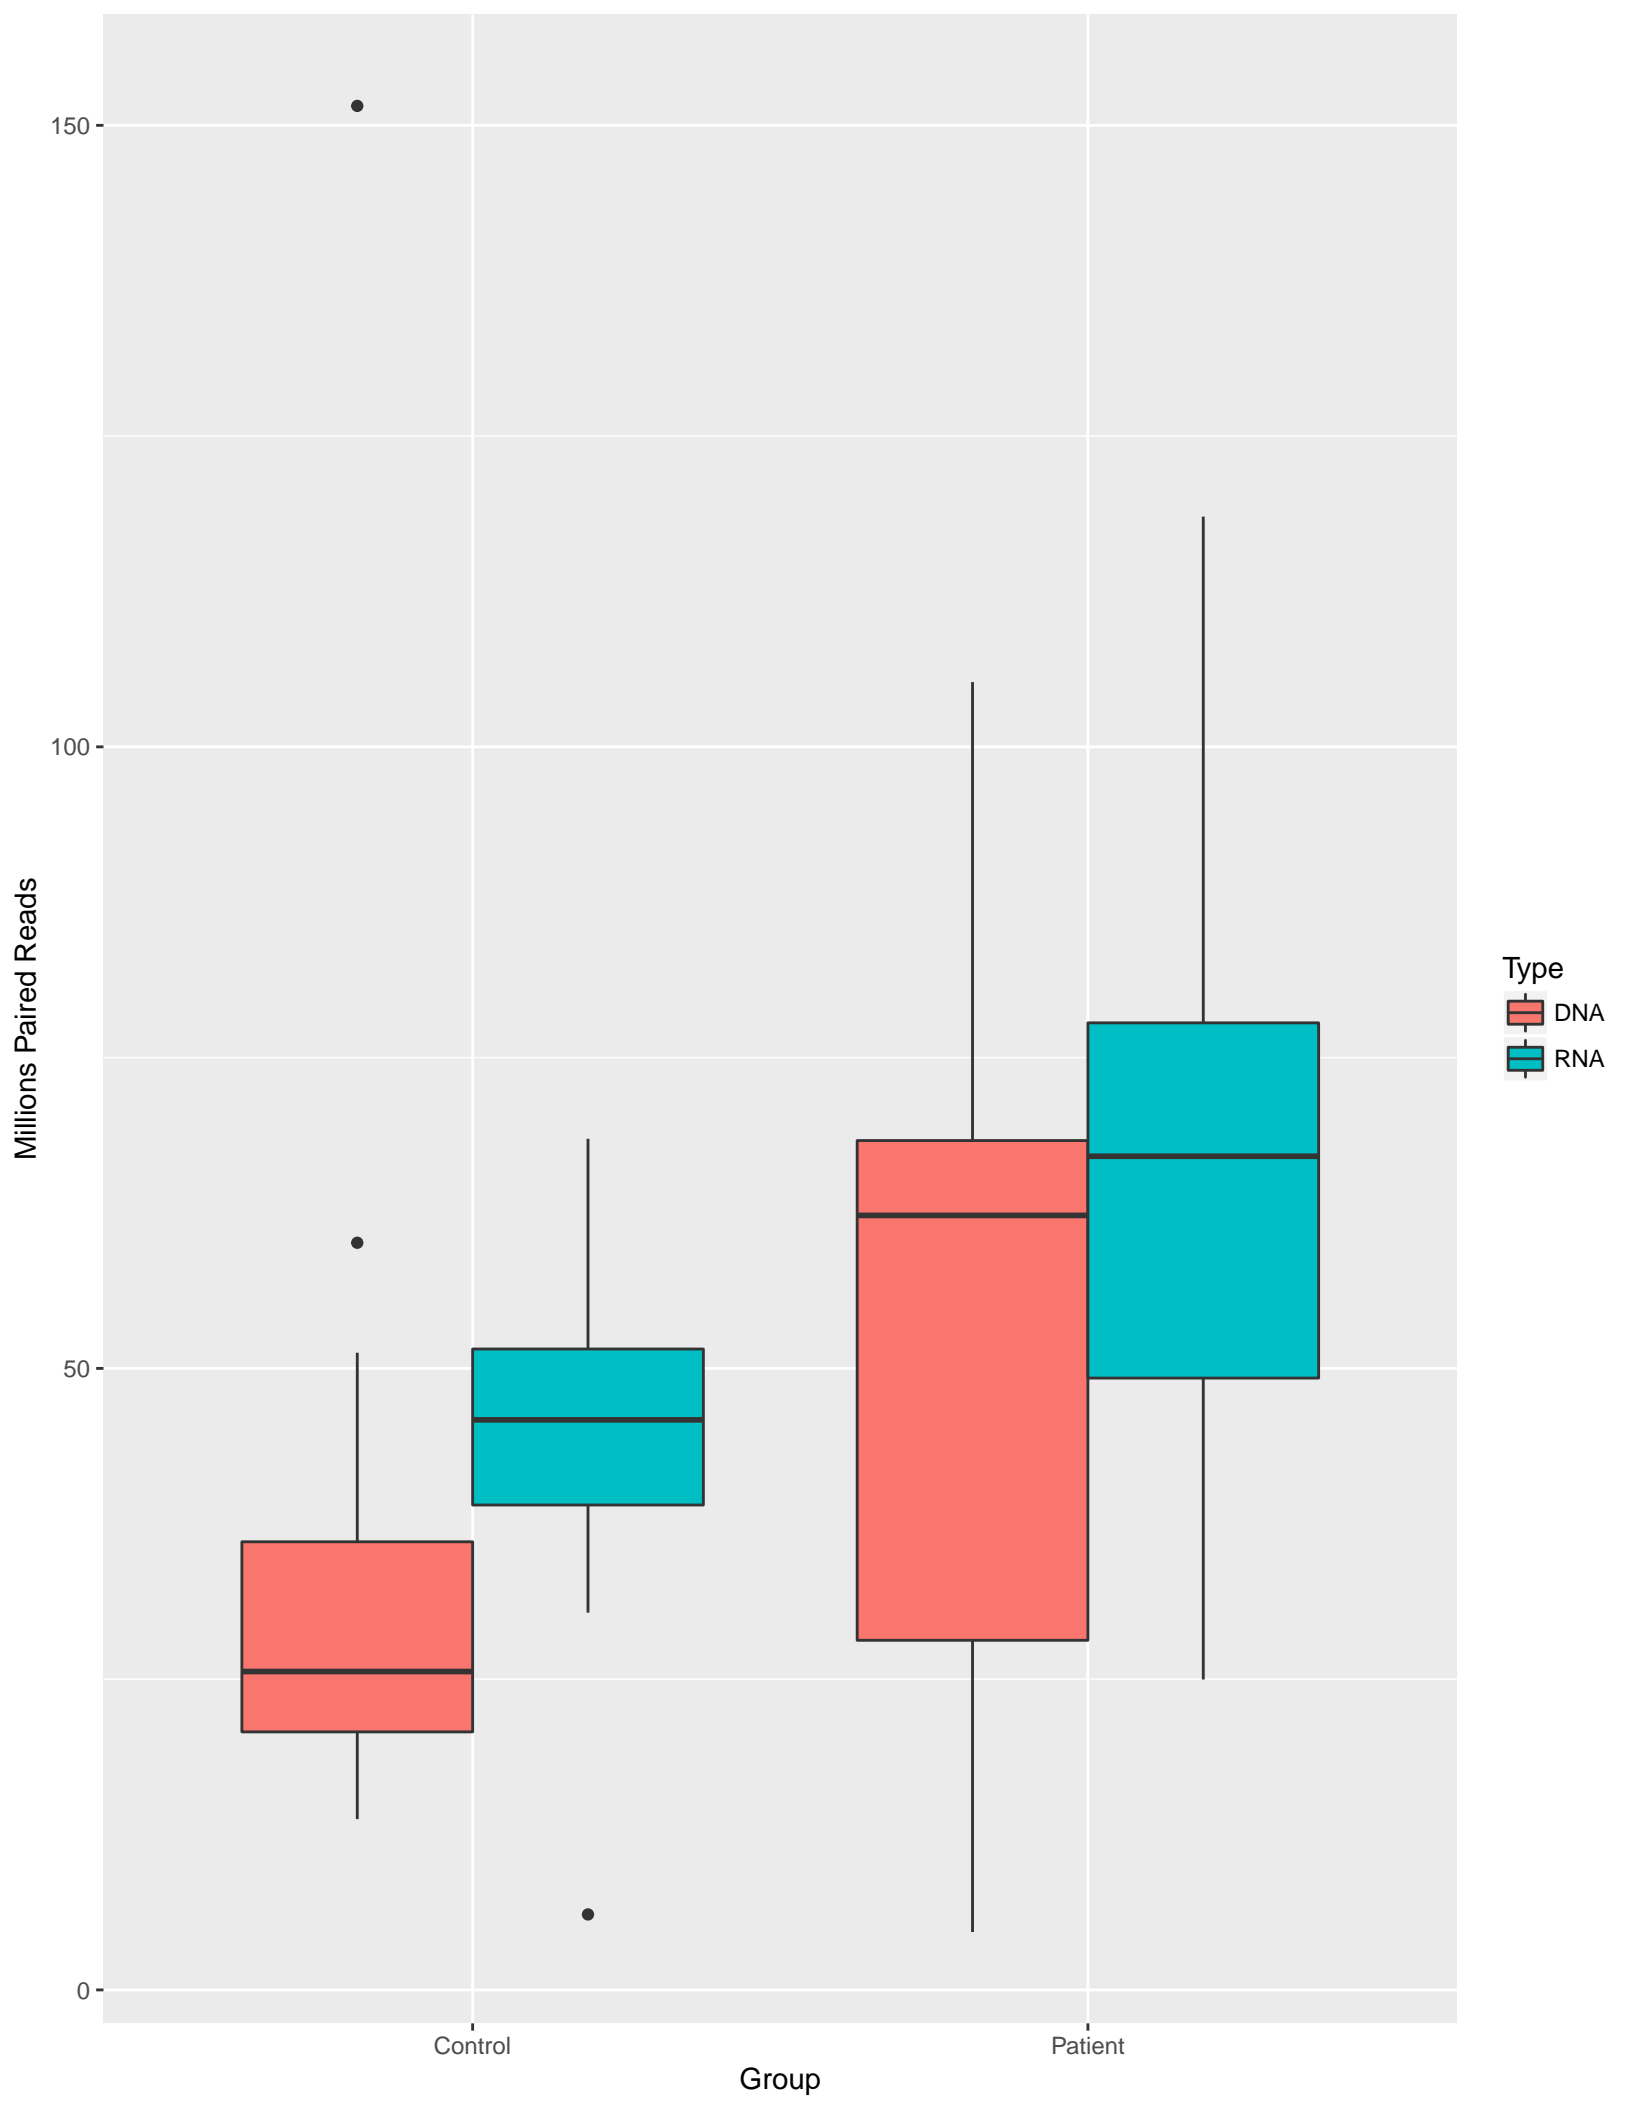

- Groups :
- █ Elective cesarean section
  - █ Elective urologic or digestive surgery
  - █ Elective orthopedic surgery

- = 0 Read
- ≤ 10 Reads
- ≤ 1.0e02 Reads
- ≤ 1.0e03 Reads
- ≤ 1.0e04 Reads
- ≤ 1.0e05 Reads
- ≤ 1.0e06 Reads
- > 1.0e06 Reads

- 1 : Most likely due to index hopping
- 2 : Probable contaminations
- ✓ : Positive by r(RT-)PCR
- # : Undetected by r(RT-)PCR

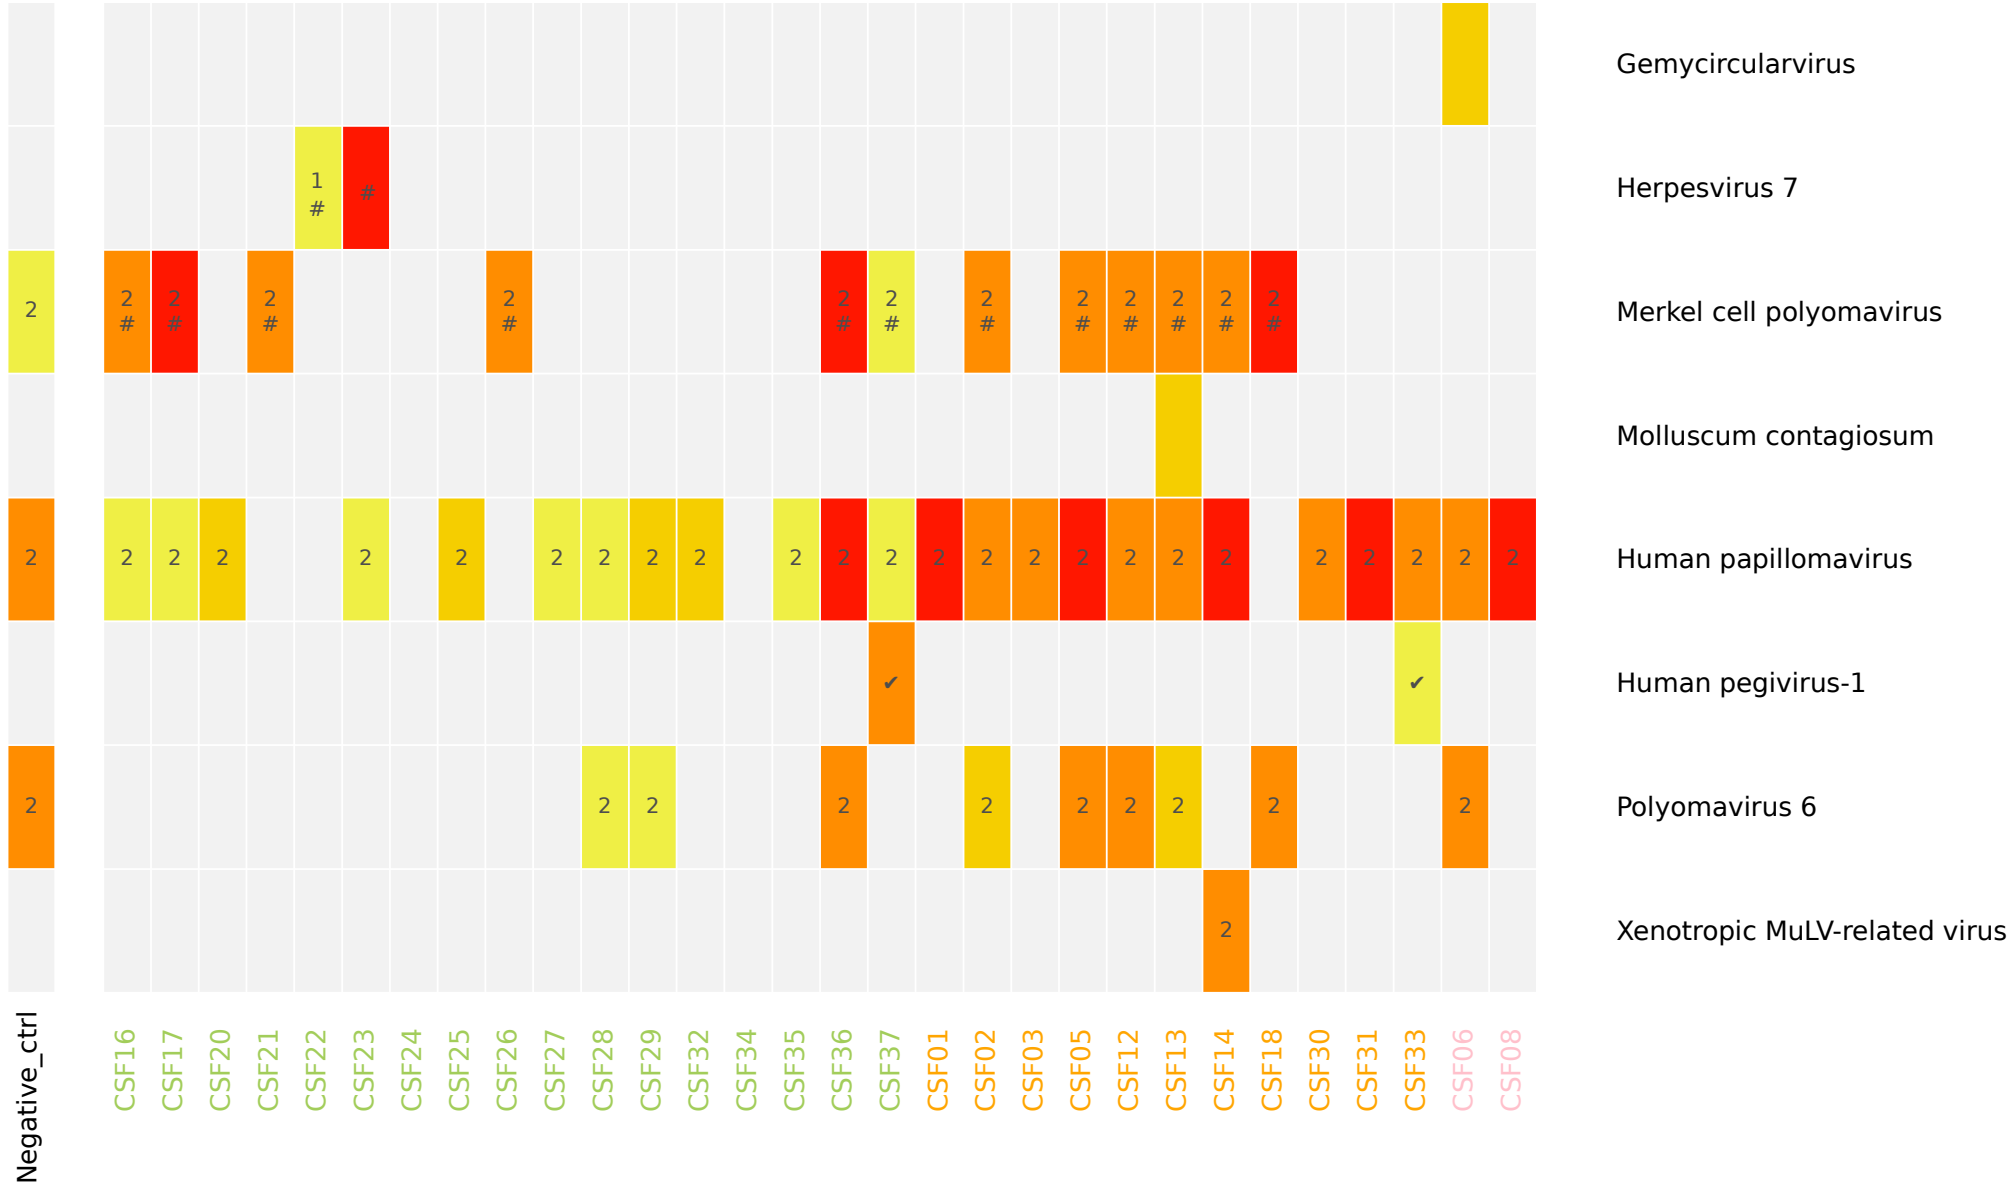



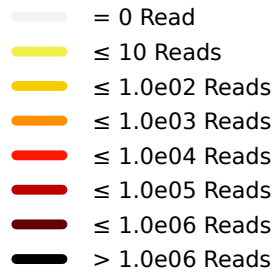

2 : Probable contaminations  
 ✓ : Positive by r(RT-)PCR  
 # : Undetected by r(RT-)PCR  
 ⌘ : Insufficient volume to be tested by r(RT-)PCR

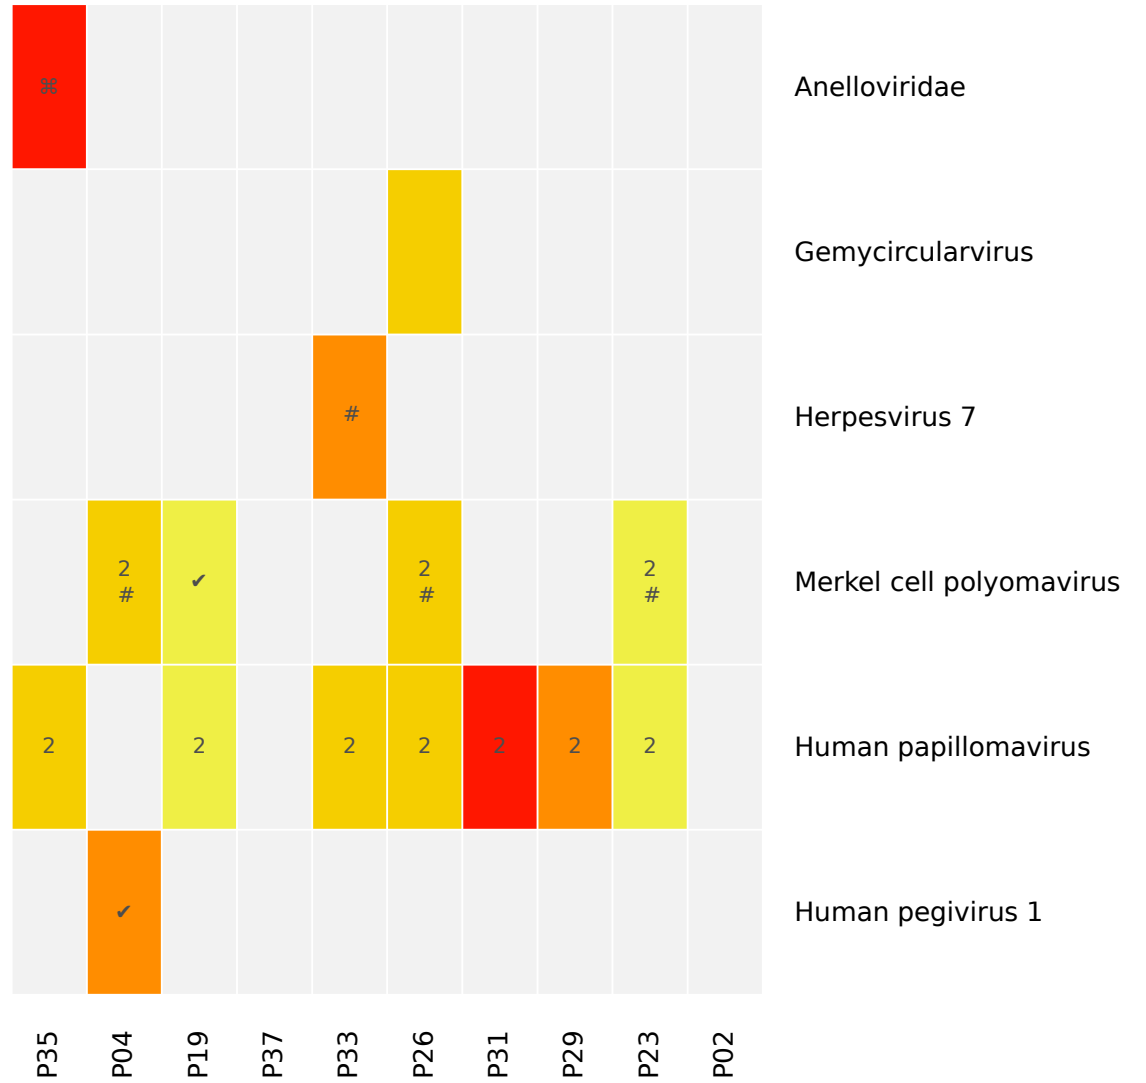

Supplement: genes-10-00625-s001.pdf [file genes-10-00625-s001.pdf]
